# Supplementary material
Source: publisher figshare collection journal article supplement (https://karger.figshare.com/ndownloader/files/11999825)
Supplement: Supplementary file 1 [file 11999825]

## Sheet: Sheet1
	Table 2. Ocular status according to eye (a), and tumor (b) at presentation and outcomes at study close (c)
	Item	Category	Mutation		Total
a)			Somatic	Germline
	Murphree IRC Version	0	20 -	3 -	23
		A	0 (0%)	5 (14%)	5
		B	0 (0%)	15 (41%)	15
		C	2 (10%)	2 (5%)	4
		D	14 (70%)	14 (38%)	28
		E	4 (20%)	1 (3%)	5
	Shields IRC Version	0	20 -	3 -	23
		A	0 (0%)	5 (14%)	5
		B	0 (0%)	15 (41%)	15
		C	2 (10%)	2 (5%)	4
		D	7 (35%)	5 (14%)	12
		E	11 (55%)	10 (27%)	21
	TNM (8th Ed)	cT0	20 -	3 -	23
		cT1a	0 (0%)	5(14%)	5
		cT1b	5 (25%)	21(57%)	26
		cT2a	1 (5%)	5(14%)	6
		cT2b	9 (45%)	3 (8%)	12
		cT3b	2 (10%)	0 (0%)	2
		cT3c	1 (5%)	3 (8%)	4
		cT4a	2 (10%)	0 (0%)	2
	Secondary Effects	Glaucoma	2 (10%)	2 (5%)	4
		Hemorrhage	8 (40%)	0 (0%)	8
		Strabismus	6 (30%)	2 (5%)	8
	Whole Eye Treatment	Enucleation	8 (40%)	2 (5%)	10
		Enucleation + neoadjuvant chemotherapy	4 (20%)	5 (14%)	9
		Systemic chemotherapy	0 (0%)	11 (30%)	11
		IAC	6 (30%)	4 (11%)	12
		IVC	0 (0%)	0 (0%)	0
		Systemic chemo & IAC	1 (5%)	8 (22%)	9
		Systemic chemo & IVC	0 (0%)	1 (3%)	1
		IAC & IVC	0 (0%)	0 (0%)	0
		Systemic chemo & IAC & IVC	1 (5%)	2 (5%)	3
	Focal Therapy*	Cryotherapy	2 (25%)	2 (7%)	4
		Laser therapy	1 (13%)	9 (30%)	10
		Cryo and laser therapy	5 (63%)	19 (63%)	24
		Secondary enucleation	3 (15%)	3 (10%)	6
	*Focal therapy percentages relate to affected eyes treated conservatively. IAC Intra-arterial chemotherapy, IVC Intra-vitreal chemotherapy
b).	Item	Category	Mutation		Total
			Somatic	Germline
	Tumor Number	Left eye	15 (75%)	60 (58%)	75
		Right Eye	5 (25%)	43 (42%)	48
	Quadrant	Superior	2 (10%)	23 (22%)	25
		Temporal	3 (15%)	18 (17%)	21
		Inferior	2 (10%)	24 (23%)	26
		Medial	9 (45%)	33 (32%)	42
		Unknown/Central	4 (20%)	5 (5%)	9
	Retinal Zone	Disc & Fovea	11 (55%)	5 (5%)	16
		Fovea	1 (5%)	6 (6%)	7
		Disc	2 (10%)	2 (2%)	4
		Macula not involving fovea	1 (5%)	11 (11%)	12
		Post-Equatorial Retina	0 (0%)	24 (23%)	24
		Equatorial Retina	1 (5%)	14 (14%)	15
		Anterior Retina	2 (10%)	25 (24%)	27
		Ora Serrata	0 (0%)	12 (12%)	12
		Unknown	2 (10%)	4 (4%)	6
	Growth Pattern	Mixed	17 (85%)	17 (17%)	34
		Endophytic	1 (5%)	5 (5%)	6
		Exophytic	2 (10%)	80 (78%)	82
		Unknown	0 (0%)	1 (1%)	1
	Vitreous Seeding	Dust	2 (10%)	3 (3%)	5
		Spheres	6 (30%)	1 (1%)	7
		Clouds	5 (25%)	0 (0%)	5
	Vitreous Seeding (Quadrants)	0	7 (35%)	16 (16%)	23
		1	1 (5%)	3 (3%)	4
		2	2 (10%)	1 (1%)	3
		3	2 (10%)	0 (0%)	2
		4	8 (40%)	0 (0%)	8
	Subretinal Seeding (Hrs)	0	15 (75%)	32 (31%)	47
		1	1 (5%)	4 (4%)	5
		2-6	3 (15%)	1 (1%)	4
		>6	1 (5%)	0 (0%)	1
c).	Outcome	Item	Mutation		Total
			Somatic	Germline
	Patients	Metastasis	0 (0%)	0 (0%)	0
		Death	0 (0%)	0 (0%)	0
		Median follow-up (range)	4 (0-32)	22 (0-48)	8 (0-48)
	Eyes	Affected Eyes	20	37	57
		Eyes treated conservatively	8	30	38
		Median follow-up (range)*	10 (3-32)	22 (0-48)	18 (0-48)
		Eyes with new tumor(s)	0 (0%)	15 (50%)	15
		Eyes with tumor growth	2 (25%)	7 (23%)	9
		Eyes with recurrence	3 (37.5%)	7 (23%)	10
		Eyes with new subretinal seeds	1 (12.5%)	5 (17%)	6
		Eyes with new vitreal seeds	0 (0%)	2 (7%)	2
		Secondary Enucleations	3 (37.5%)	2 (7%)	5
	Tumors	Tumors at first EUA	20	103	123
		Tumors treated conservatively at first EUA	8	93	101
		New tumors developing after first EUA	0	55	55
		All tumors treated conservatively	8	148	156
		Tumors with growth**	2 (25%)	12 (8%)	14
		Tumors with recurrence**	1 (12.5%)	14 (9%)	15
		*Eyes treated conservatively; **Percentages relate to tumors treated conservatively
